# Supplementary material for: Fish DNA Sensors for Authenticity Assessment—Application to Sardine Species Identification
Source: MDPI journal article supplement (doi:10.3390/molecules29030677), 2024-02-01
Supplement: s1 [file s1]

## Supplementary material

# Fish DNA Sensors for Authenticity Assessment—Application to Sardine Species Identification

Myrto Kakarelidou <sup>1</sup>, Panagiotis Christopoulos <sup>1</sup>, Alexis Conides <sup>2</sup>, Despina P. Kalogianni <sup>1,\*</sup>  
and Theodore K. Christopoulos <sup>1,3,\*</sup>

<sup>1</sup> Analytical/Bioanalytical Chemistry & Nanotechnology Group, Department of Chemistry, University of Patras, Rio, 26504 Patras, Greece; myrtokakarelidou@gmail.com (M.K.); pkchristop@gmail.com (P.C.)

<sup>2</sup> Hellenic Centre for Marine Research, Institute for Marine Biological Resources, 46.7 km Athens-Sounion, Anavyssos, 19013 Attika, Greece; conides@hcmr.gr

<sup>3</sup> Institute of Chemical Engineering Sciences, Foundation for Research and Technology Hellas (FORTH/ICE-HT), Platani, 26504 Patras, Greece

\* Correspondence: kalogian@upatras.gr (D.P.K.); tchrist@upatras.gr (T.K.C.)

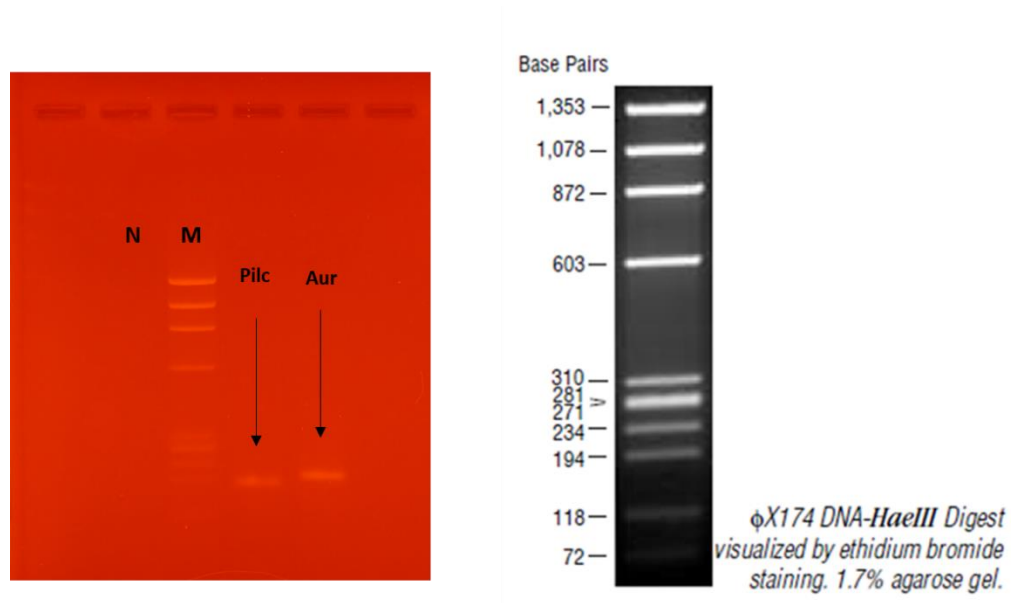

**Figure S1.** Electropherogram of PCR products for *S. pilchardus* with *S. aurita*. N: negative, M: DNA marker ( $\phi$ X174 DNA HaeIII Digest on the right), Pilc: *S. pilchardus* and Aur: *S. aurita*.

## Mixtures of PCR products

*% Content of S. aurita in S. pilchardus*

*DNA sensor with S. pilchardus probe*

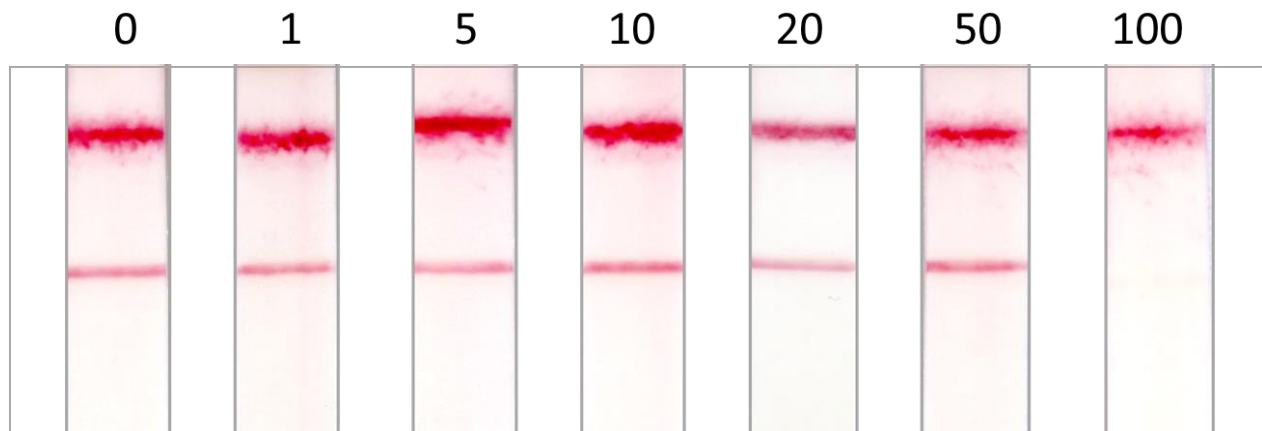

**Figure S2.** Mixtures of PCR products. The mixtures contained 0 – 100 % PCR product from *S. aurita* in PCR product from *S. pilchardus* with a total amount of 100 fmol on the strip.

## Mixtures of processed samples

*% Content of S. aurita in S. pilchardus*

*DNA sensor with S. pilchardus probe*

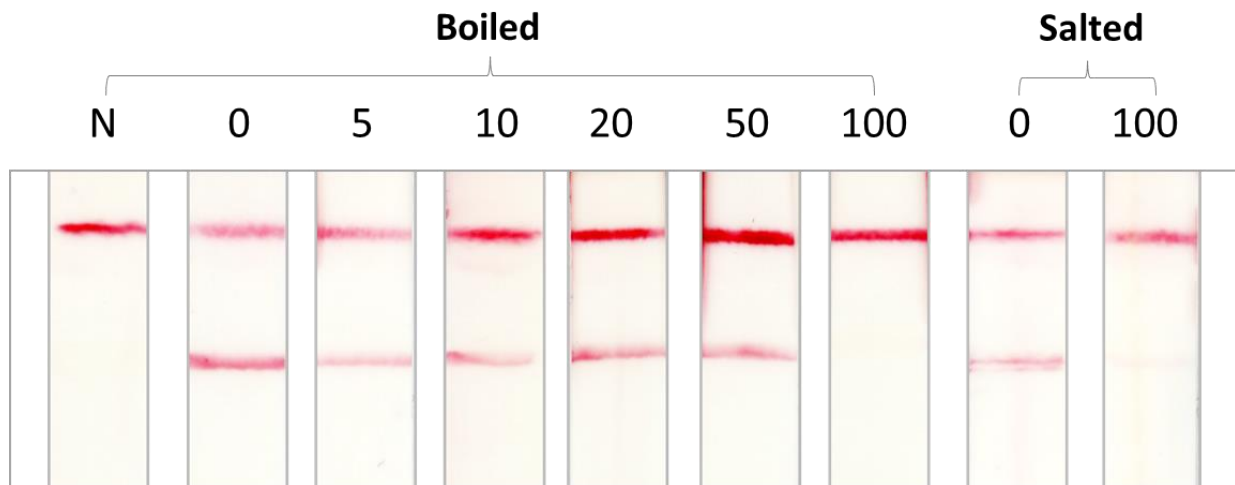

**Figure S3.** Mixtures of processed samples. The mixtures contained 0 – 100 % of *S. aurita* (tissue) in *S. pilchardus*.

**Table S1.** Comparison of methods for sardines' adulteration detection

| Method                                                                     | Species examined                                                                                                                                                                                    | LOD | Discrimination capability                    | Quantitation capability | Ref.      |
|----------------------------------------------------------------------------|-----------------------------------------------------------------------------------------------------------------------------------------------------------------------------------------------------|-----|----------------------------------------------|-------------------------|-----------|
| PCR-RFLP and phylogenetic analysis                                         | <i>S. pilchardus</i><br><i>S. aurita</i><br><i>S. melanostictus</i><br><i>S. caeruleus</i><br><i>S. maderensis</i>                                                                                  | -   | Low                                          | -                       | 12        |
| PCR-RFLP and DNA sequencing                                                | <i>S. pilchardus</i><br><i>S. aurita</i><br><i>S. brasiliensis</i><br><i>S. sagax</i><br><i>S. caeruleus</i>                                                                                        | -   | Low for PCR-RFLP and high for DNA sequencing | ✓<br>for DNA sequencing | 13        |
| PCR-RFLP and phylogenetic analysis                                         | <i>S. pilchardus</i><br><i>S. aurita</i>                                                                                                                                                            | -   | Low                                          | -                       | 14        |
| DNA sequencing and phylogenetic analysis                                   | <i>S. pilchardus</i><br><i>S. aurita</i>                                                                                                                                                            | 5%  | High                                         | ✓                       | 6         |
| DNA sequencing and phylogenetic analysis                                   | <i>S. pilchardus</i><br><i>S. aurita</i><br><i>S. sagax</i><br><i>S. caeruleus</i><br><i>S. melanostictus</i><br><i>S. maderensis</i><br><i>S. longiceps</i>                                        | -   | High                                         | ✓                       | 15        |
| DNA sequencing and phylogenetic analysis                                   | <i>S. pilchardus</i><br><i>S. aurita</i><br><i>S. longiceps</i><br><i>S. lemuru</i><br><i>S. brasiliensis</i><br><i>S. gibbose</i><br><i>S. jussieu</i><br><i>S. fimbriata</i><br><i>S. tawilis</i> | -   | High                                         | ✓                       | 16        |
| PCR and agarose gel electrophoresis                                        | <i>S. pilchardus</i>                                                                                                                                                                                | -   | Medium                                       | -                       | 17        |
| PCR and agarose gel electrophoresis                                        | <i>S. pilchardus</i><br><i>S. aurita</i><br><i>S. maderensis</i>                                                                                                                                    | -   | Medium                                       | -                       | 18        |
| PCR and agarose gel electrophoresis                                        | <i>S. pilchardus</i>                                                                                                                                                                                | -   | Medium                                       | -                       | 19        |
| Exon-primed intron-crossing (EPIC) PCR with acrylamide gel electrophoresis | <i>S. pilchardus</i>                                                                                                                                                                                | -   | Medium                                       | -                       | 20        |
| Real-time PCR / SYBR Green                                                 | <i>S. pilchardus</i>                                                                                                                                                                                | -   | Medium                                       | ✓                       | 21        |
| Real-time PCR / Taqman probes                                              | <i>S. pilchardus</i><br><i>S. aurita</i>                                                                                                                                                            | -   | High                                         | ✓                       | 5         |
| Real-time PCR / Taqman probes                                              | <i>S. pilchardus</i>                                                                                                                                                                                | -   | High                                         | ✓                       | 22        |
| Real-time PCR / Melting curve analysis                                     | <i>S. pilchardus</i>                                                                                                                                                                                | -   | High                                         | ✓                       | 23        |
| Real-time PCR / High-resolution Melting curve analysis (HRM)               | <i>S. pilchardus</i>                                                                                                                                                                                | -   | High                                         | ✓                       | 24        |
| DNA sensor                                                                 | <i>S. pilchardus</i><br><i>S. aurita</i>                                                                                                                                                            | 5%  | High                                         | -                       | This work |
